# Supplementary material
Source: PubMed Central journal article supplement (PMC9581336)
Supplement: NIHMS1808983-supplement-1.pdf [file NIHMS1808983-supplement-1.pdf]

## Supporting Information

### **Ultrasoft Porous 3D Conductive Dry Electrodes for Electrophysiological Sensing and Myoelectric Control**

*Shanshan Yao\**, *Weixin Zhou*, *Robert Hinson*, *Penghao Dong*, *Shuang Wu*, *Jasmine Ives*,  
*Xiaogang Hu*, *He Huang*, *Yong Zhu\**

Corresponding Authors

E-mail: shanshan.yao@stonybrook.edu; yong\_zhu@ncsu.edu

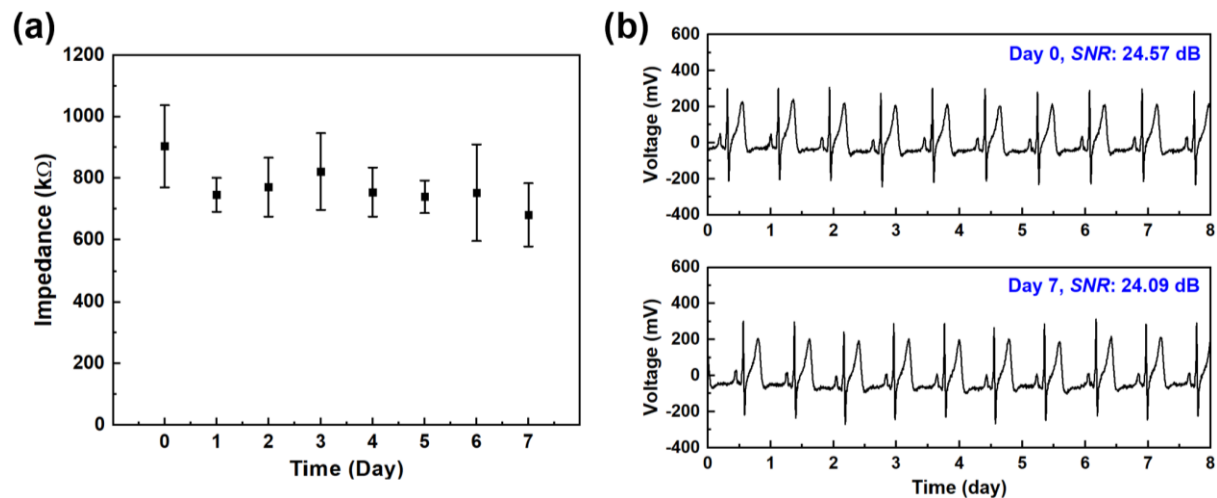

**Figure S1.** Evaluation of the developed porous dry AgNW/Ecoflex electrodes during 7-day continuous wear with light physical activities. (a) Changes in the electrode-skin impedance at 1 Hz for 7 days (measured at 8 pm every day). (b) Comparison of ECG signals collected from the electrodes on day 0 and day 7 at 8 pm.

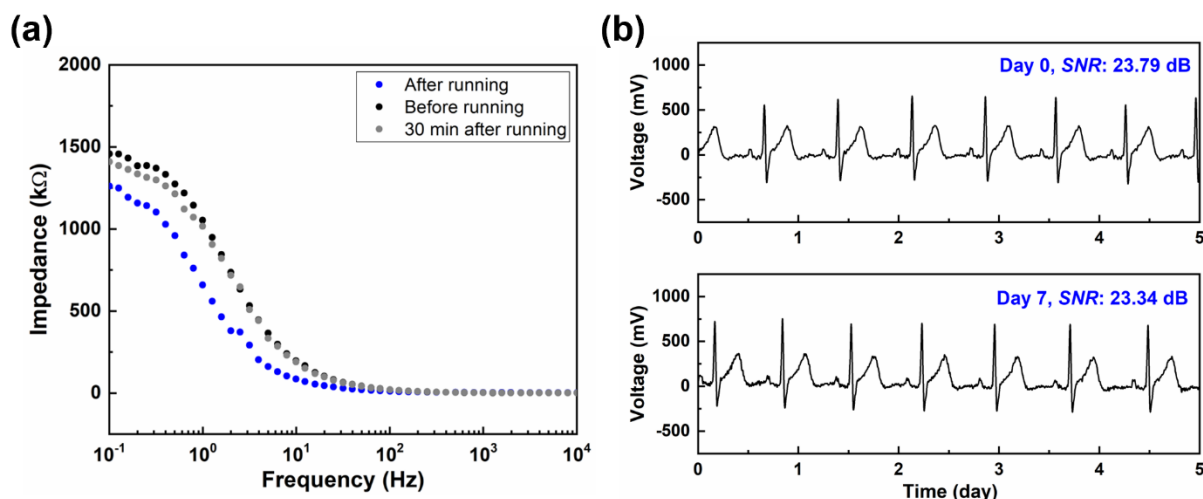

**Figure S2.** Evaluation of the developed porous dry AgNW/Ecoflex electrodes during 7-day continuous wear with intensive physical activities. The subject was asked to run on the treadmill with an average speed of around 7 mph every day at 3 pm. (a) Changes in the electrode-skin impedance at 1 Hz before and after running. (b) Comparison of ECG signals collected from the electrodes on day 0 and day 7 at 8 pm.

For experiments conducted in Figures S1 and S2, four electrodes were continuously worn on the skin surface and only temporarily taken off during bathing or showering. Two electrodes were placed 3 cm apart on the left forearm for electrode-skin impedance measurements. For ECG sensing, one of these electrodes from the left forearm and another electrode placed on the right forearm were used as the recording and reference electrodes. One electrode placed on the right ankle was used as the ground electrode. Details about electrode-skin impedance measurements and ECG signal collection and processing can be found in the “Methods” section.

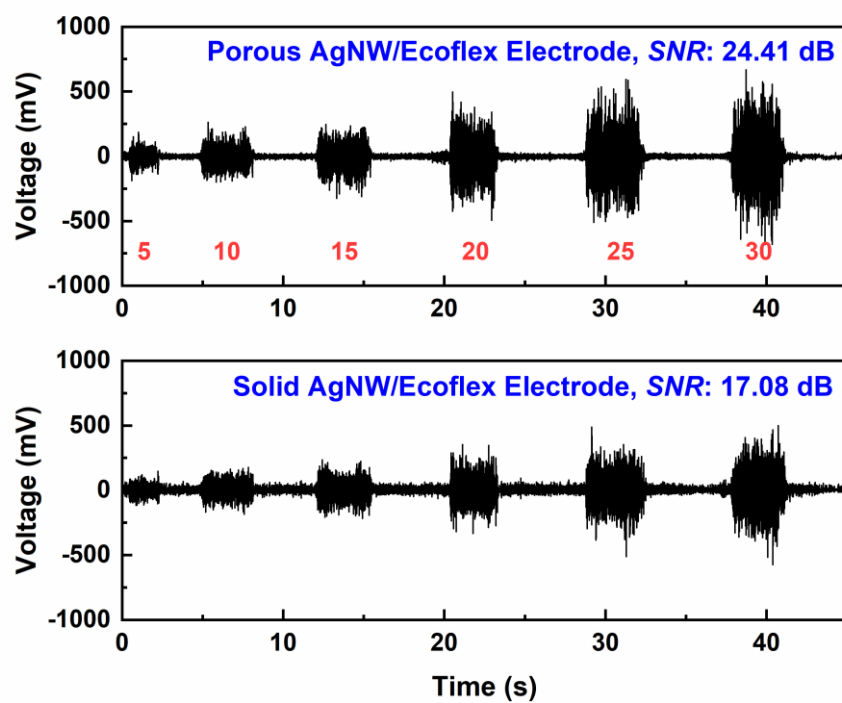

**Figure S3.** Comparison of EMG signals collected with the developed ultrasoft porous AgNW/Ecoflex electrodes and much stiffer solid AgNW/Ecoflex electrodes without the porous structure. During the experiments, the subject was asked to squeeze a hand dynamometer with different grip strengths from 5 to 30 N as measured by the hand dynamometer.

**Table S1.** Fitting data of the measured electrode-skin impedance (Figure 3d) for solid AgNW/Ecoflex and porous AgNW/Ecoflex electrodes. The equivalent circuit model is shown below.

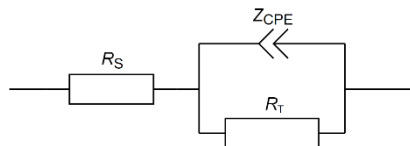

| Parameters                   | Porous AgNW/Ecoflex Electrodes | Solid AgNW/Ecoflex Electrodes |
|------------------------------|--------------------------------|-------------------------------|
| $R_S$ ( $\Omega$ )           | 132.1                          | 372.4                         |
| $R_T$ ( $M\Omega$ )          | 1.72                           | 4.30                          |
| CPE- $Q$ ( $\mu F s^{n-1}$ ) | 0.79                           | 0.56                          |
| CPE- $n$                     | 0.80                           | 0.74                          |

**Table S2.** Comparisons of 10 porous AgNW/Ecoflex electrodes fabricated in 5 batches. Granulated sugars were used as the sacrificial template and 8 dip-coating cycles were performed to achieve the conductivity listed below. Details about electrode-skin impedance measurements and ECG signal collection/processing can be found in “Methods”.

| <b>Sample Number</b> | <b>Conductivity (S/cm)</b> | <b>Modulus (kPa)</b> | <b>Electrode-Skin Impedance (at 1 Hz, k<math>\Omega</math>)</b> | <b>SNR (dB)</b> |
|----------------------|----------------------------|----------------------|-----------------------------------------------------------------|-----------------|
| 1                    | 315                        | 11.8                 | 964.4                                                           | 24.45           |
| 2                    | 65.5                       | 3.7                  | 898.0                                                           | 25.89           |
| 3                    | 15.7                       | 9.6                  | 955.8                                                           | 24.93           |
| 4                    | 85.4                       | 23.2                 | 1001.1                                                          | 22.97           |
| 5                    | 105.5                      | 10.1                 | 973.5                                                           | 24.65           |
| 6                    | 37.3                       | 5.8                  | 942.5                                                           | 24.97           |
| 7                    | 77.9                       | 17.7                 | 978.8                                                           | 23.99           |
| 8                    | 65.8                       | 8.9                  | 957.0                                                           | 25.29           |
| 9                    | 45.1                       | 10.3                 | 967.4                                                           | 24.57           |
| 10                   | 174.1                      | 36.1                 | 1053.7                                                          | 21.38           |
